# Supplementary material for: Selective ion-permeable membranes by insertion of biopores into polymersomes
Source: Royal Society of Chemistry journal article supplement (doi:10.1039/c4cp05879h), 2015-01-01
Supplement: c4cp05879h1.pdf [file c4cp05879h1.pdf]

# *Selective ion-permeable membranes by insertion of biopores into polymersomes*

## **Supporting Information**

*Mihai Lomora<sup>#</sup>, Fabian Itel<sup>#</sup>, Ionel Adrian Dinu and Cornelia G. Palivan<sup>\*</sup>*

Department of Chemistry, University of Basel, Klingelbergstrasse 80, CH-4056 Basel,  
Switzerland

<sup>\*</sup> Email: [cornelia.palivan@unibas.ch](mailto:cornelia.palivan@unibas.ch)

<sup>#</sup> Authors contributed equally to this study

## Size, morphology and stability of A<sub>6</sub>B<sub>44</sub>A<sub>6</sub> polymersomes - TEM and LS characterization

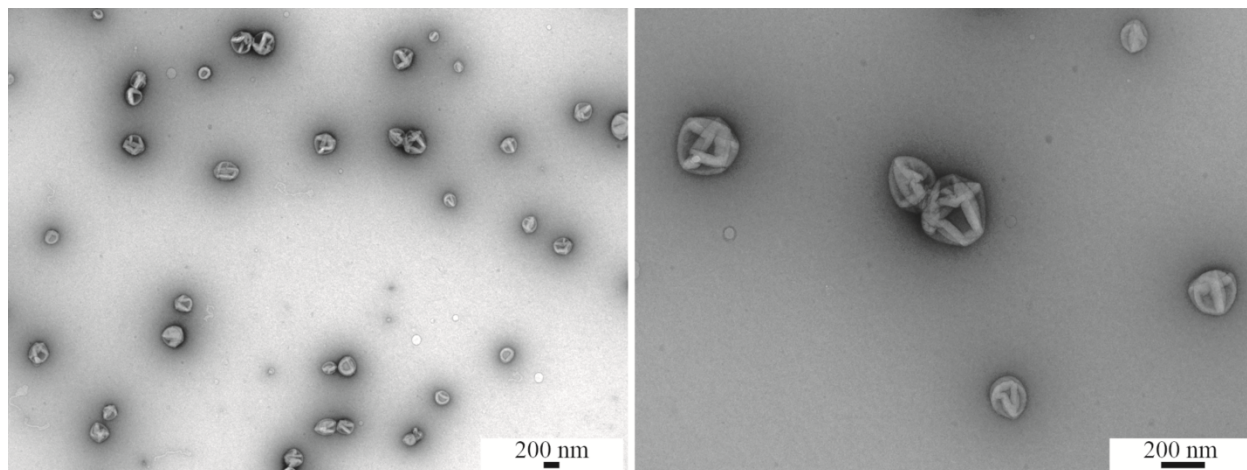

**Fig. S1** TEM micrograph of ACG loaded polymersomes of A<sub>6</sub>B<sub>44</sub>A<sub>6</sub> in the presence of 3.74  $\mu$ M ionomycin: sample overview (left) and zoom in micrograph (right).

**Table S1** Molecular parameters of 3-D assemblies of PMOXA<sub>6</sub>-PDMS<sub>44</sub>-PMOXA<sub>6</sub> without and with ionomycin, and in the presence of 830  $\mu$ M CaCl<sub>2</sub>.

| Size and stability of calcium sensing nanodevices                             | DLS/SLS*                                |                             |                                                               |       |
|-------------------------------------------------------------------------------|-----------------------------------------|-----------------------------|---------------------------------------------------------------|-------|
|                                                                               | $M_{w,agg} \times 10^{-8}$<br>[g/mol]** | $N_{agg} \times 10^{-4}$ ** | $A_2 \times 10^8$<br>[mol·dm <sup>3</sup> /g <sup>2</sup> ]** | PDI** |
| A <sub>6</sub> B <sub>44</sub> A <sub>6</sub>                                 | 1.82                                    | 4.04                        | - 9.44                                                        | 0.09  |
| A <sub>6</sub> B <sub>44</sub> A <sub>6</sub> + ionomycin                     | 5.75                                    | 12.77                       | - 0.14                                                        | 0.12  |
| A <sub>6</sub> B <sub>44</sub> A <sub>6</sub> + ionomycin + CaCl <sub>2</sub> | 4.43                                    | 9.84                        | - 0.06                                                        | 0.09  |

\*Dynamic – and static light scattering experiments in dilute polymersome solutions;

\*\*  $M_{w,agg}$  – apparent molecular weight,  $N_{agg}$  – the average aggregation number,  $A_2$  – second virial coefficient, and PDI – polydispersity index for polymersomes.

**Table S2 Surface ( $\zeta$ ) Potential**

| Parameters    | ACG*   | Empty<br>$A_6B_{44}A_6$<br>polymersomes | $A_6B_{44}A_6$<br>polymersomes<br>with entrapped<br>ACG | $A_6B_{44}A_6$<br>polymersomes<br>with entrapped<br>ACG<br>+ 3.74 $\mu$ M<br>Ionomycin | $A_6B_{44}A_6$<br>polymersomes<br>with entrapped<br>ACG<br>+ 3.74 $\mu$ M<br>Ionomycin +<br>CaCl <sub>2</sub> |
|---------------|--------|-----------------------------------------|---------------------------------------------------------|----------------------------------------------------------------------------------------|---------------------------------------------------------------------------------------------------------------|
| $\zeta$ [mV]  | - 7.54 | 5.43                                    | 4.56                                                    | 2.04                                                                                   | 2.31                                                                                                          |
| $\pm$ SD, n=3 | 1.67   | 0.30                                    | 0.43                                                    | 0.24                                                                                   | 0.33                                                                                                          |

\* Asante Calcium Green;

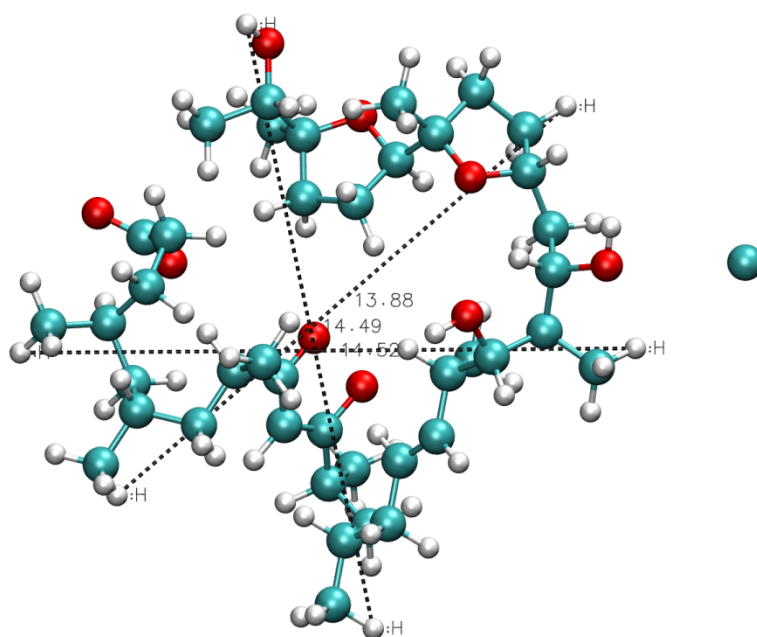

**Fig. S2** Size estimation of ionomycin molecule, taking into account the molecule diameter as the largest distance from one end to another.

### Behaviour of fluorescence intensity of free ACG

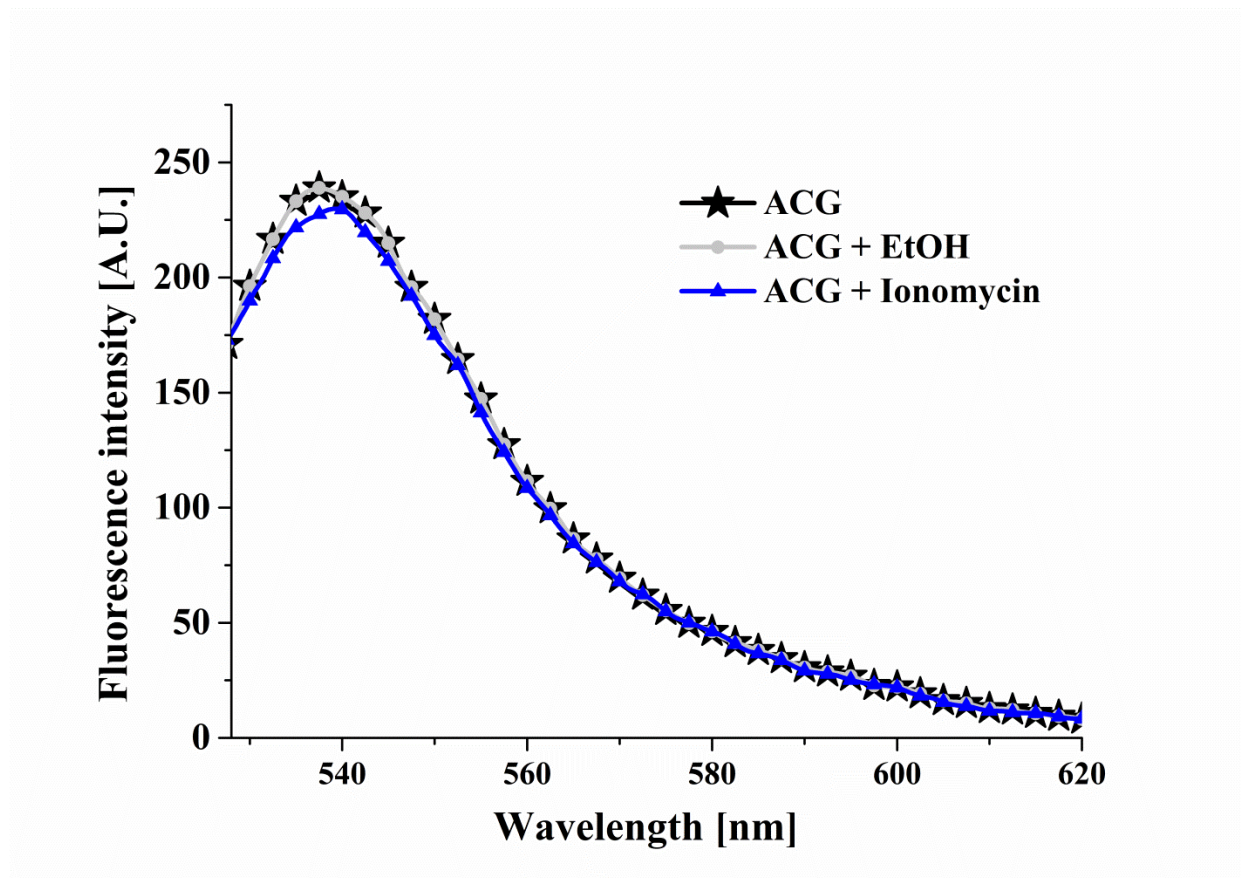

**Fig. S3** Influence of EtOH and ionomycin upon fluorescence intensity increase of the free Asante Calcium Green (ACG) solution in the presence of 830  $\mu\text{M}$   $\text{CaCl}_2$ .

## Polymersomes with inserted and functional ionomycin

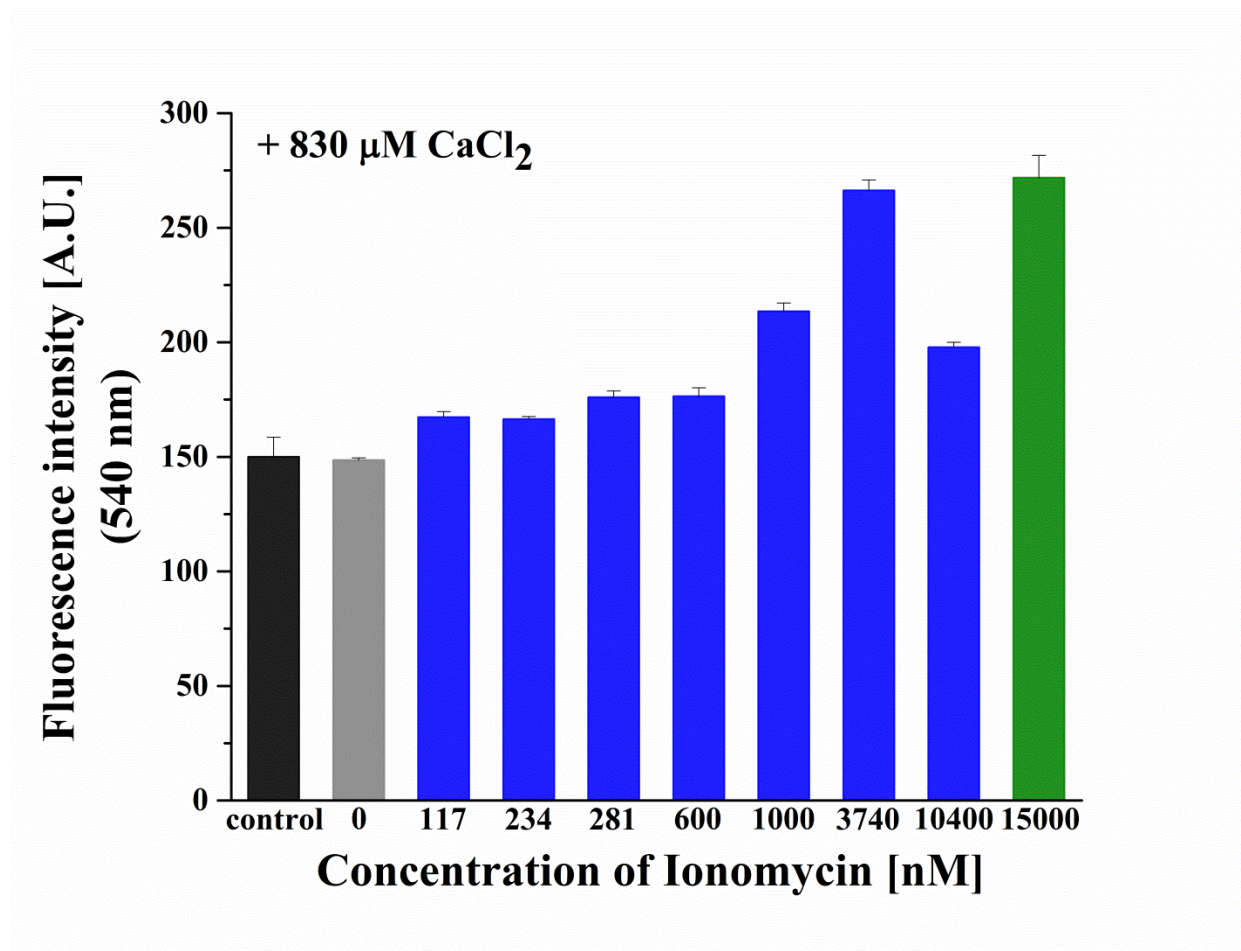

**Fig. S4** Influence of ionomycin concentration on membrane permeabilization of A<sub>6</sub>B<sub>44</sub>A<sub>6</sub> polymersomes. The concentration of CaCl<sub>2</sub> was maintained constant at 830 μM for ACG loaded A<sub>6</sub>B<sub>44</sub>A<sub>6</sub> polymersomes (black bar), in the presence of ethanol (grey bar) and increasing concentrations of ionomycin (blue and green bars). Error bars are shown as standard deviations of three individual measurements.



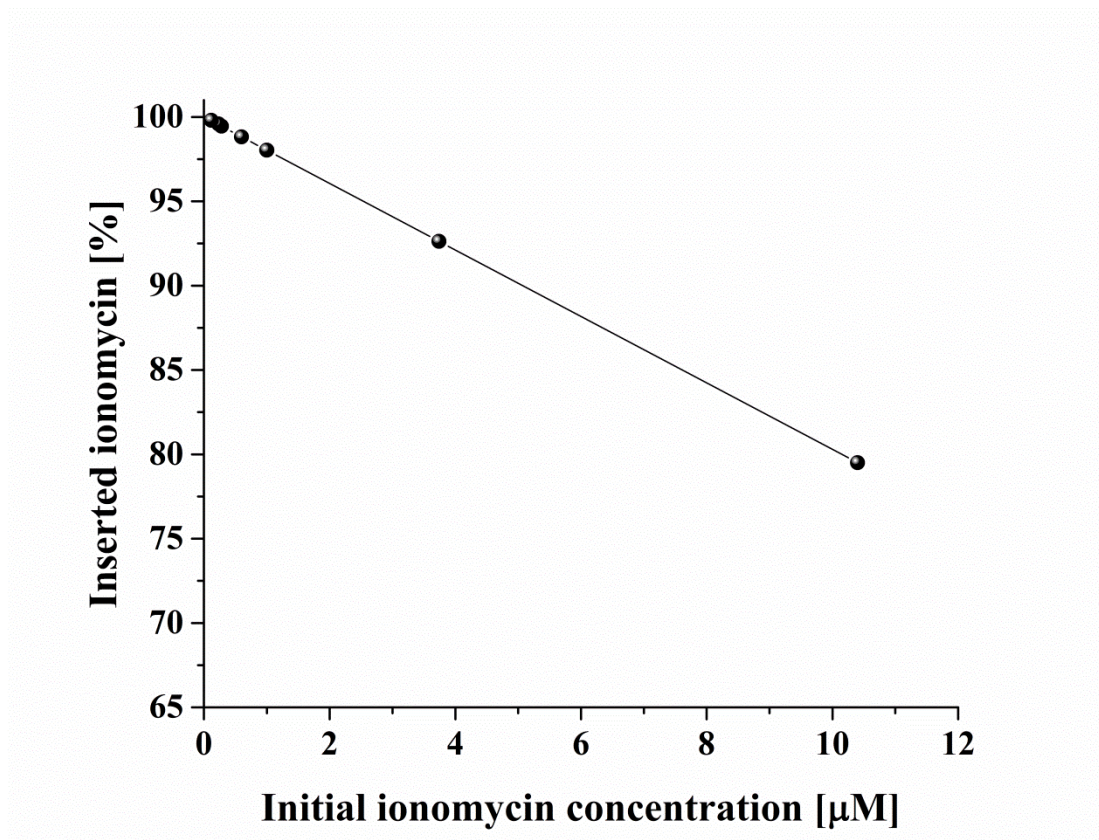

**Fig. S5** Ionomycin insertion in polymersome membrane, given as percentage.

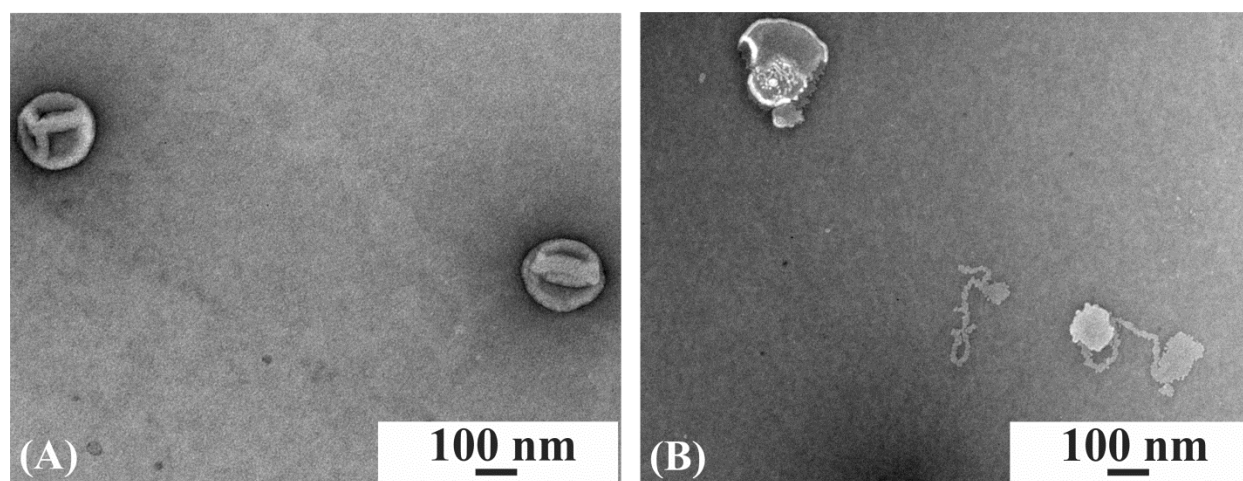

**Fig. S6** TEM micrograph of ACG loaded polymersomes of  $\text{A}_6\text{B}_{44}\text{A}_6$  in the presence of  $10.4 \mu\text{M}$  (A) and  $15 \mu\text{M}$  ionomycin (B).

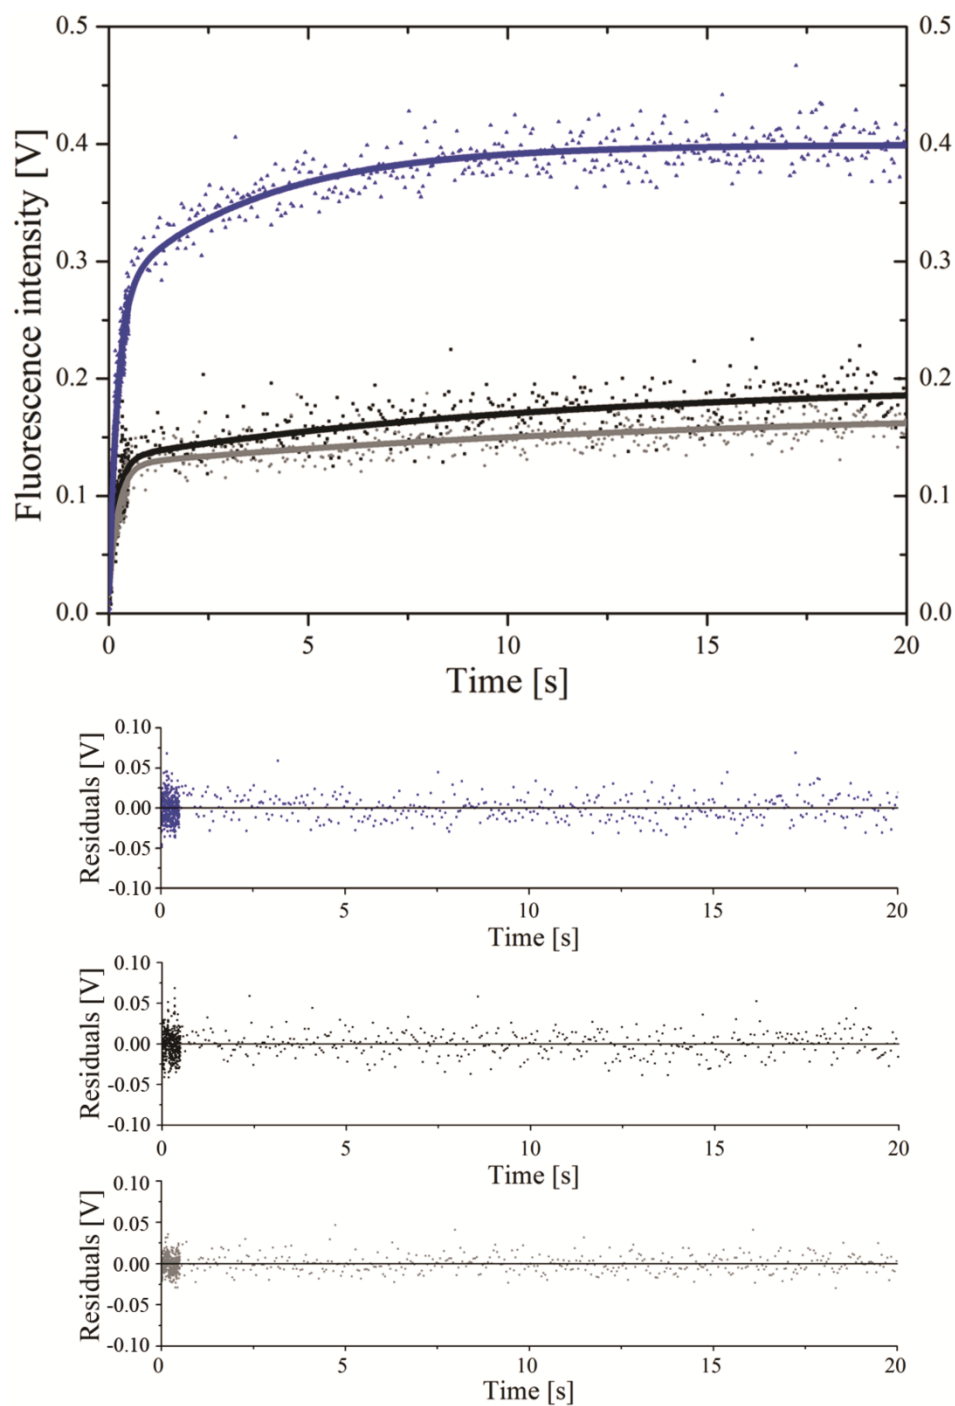

**Fig. S7** Fluorescence intensity increase of ACG-loaded  $A_6B_{44}A_6$  polymersomes observed by stopped-flow spectroscopy - before (black and grey curves), and after insertion of ionomycin (blue curve). Residuals for fits to a double exponential equation are shown in the lower panel.

**Table S3** Diffusion coefficients of different fluorescent species within polymer and lipid membranes.

| Membrane type  | Measured species    | $M_{w,species}$ [g/mol] | $D$ [ $\mu\text{m}^2/\text{s}$ ] (20 °C) |
|----------------|---------------------|-------------------------|------------------------------------------|
| $A_7B_{49}A_7$ | SRB- $A_7B_{49}A_7$ | 5100                    | $1.4 \pm 0.1^1$                          |
|                | Bodipy 630/650      | 660                     | $4.7 \pm 0.5$                            |
| POPC           | Rhod-PE             | 1000                    | $12.5 \pm 0.5^1$                         |

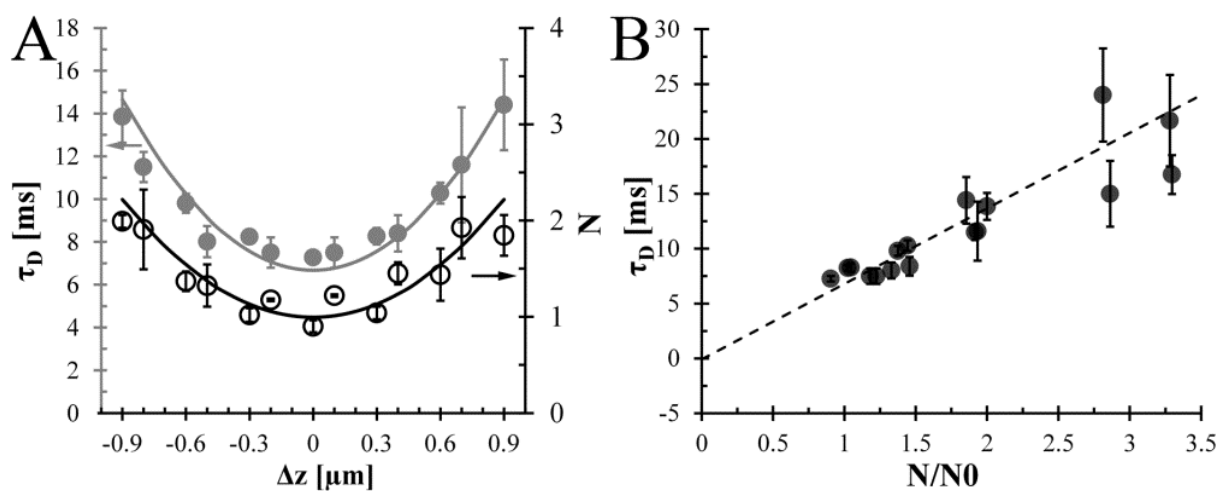

**Fig. S8** Diffusion measurements of Bodipy 630/650 within polymersome membrane. A) Z-scan FCS data of Bodipy diffusion within  $A_7B_{49}A_7$  membrane. B) Z-scan FCS law showing the free-diffusion character of small hydrophobic molecules.



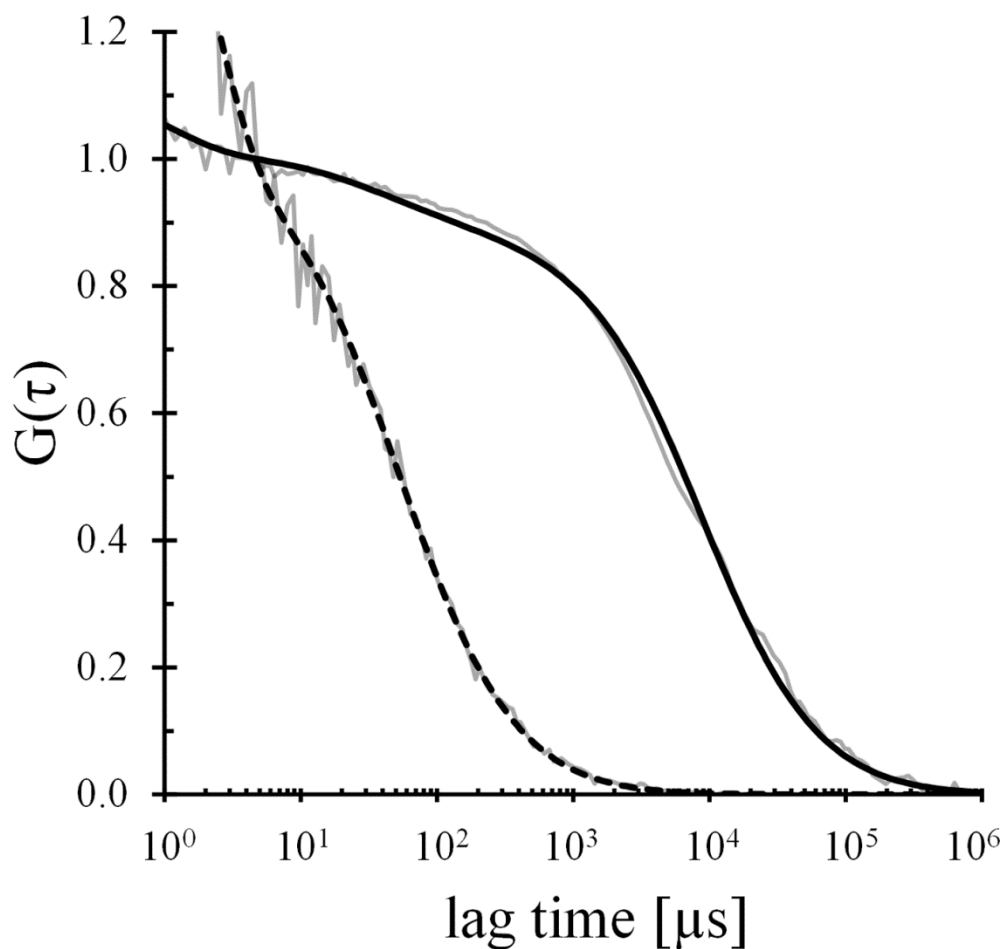

**Fig. S9** Fluorescence correlation spectroscopy (FCS) measurements of ACG interaction with polymersomes. Polymersomes were prepared in absence of ACG. Then ACG was added (20  $\mu$ M) outside to the polymersomes. After overnight incubation, the diffusion time showed a strong shift to larger particles (polymersome fraction). 90 % of ACG was interacting with the polymersome membrane (high diffusion time – slow diffusing fraction – solid line), while only 10 % of the ACG remained in the solution (fast diffusion time – fast diffusing fraction – dotted line).

### GUV membrane interaction in the presence of ACG - visualization by CLSM

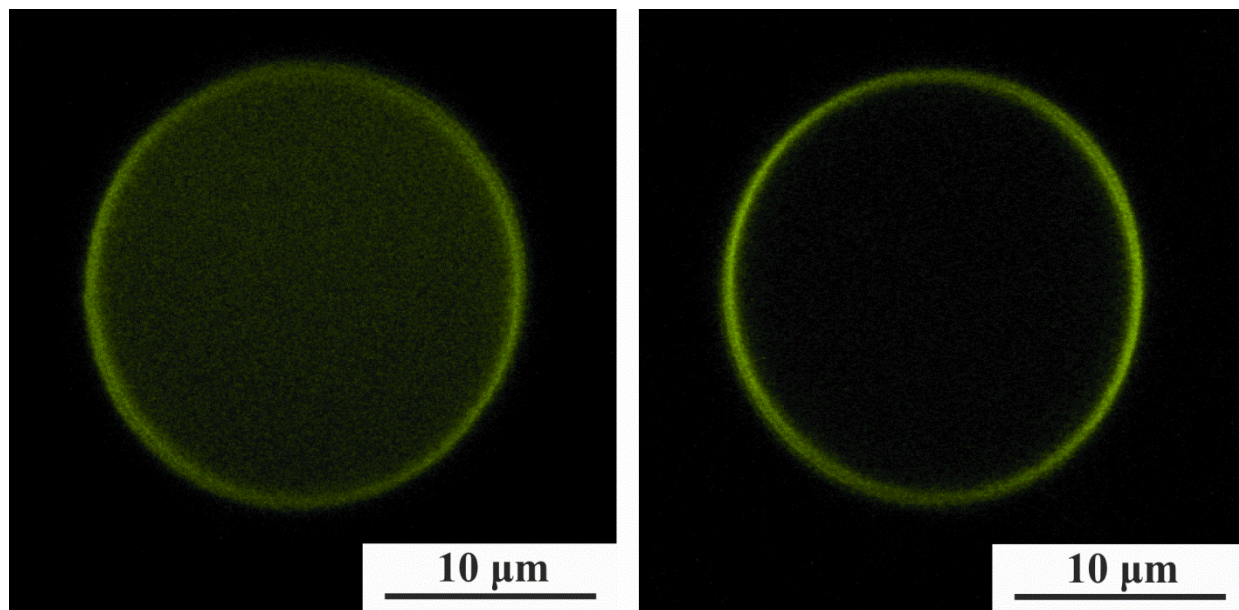

**Fig. S10** Confocal laser scanning microscopy (CLSM) micrographs showing ACG interaction with  $A_6B_{44}A_6$  GUVs membrane. Left: before bleaching. ACG shows fluorescence inside the vesicle, while outside of the vesicle the ACG concentration is reduced due to dilution of the GUVs into the buffer. Right: After bleaching. The polymeric membrane stays fluorescent, while the free ACG encapsulated in the GUV is bleached. This shows that ACG interacts strongly with the membrane having therefore a strong fluorescence signal emitted from the membrane.

**Table S4** Stopped-flow data analysis. Rate constants ( $k_1$  and  $k_2$ ) and amplitude changes ( $\Delta A_1$  and  $\Delta A_2$ ) were determined from fitting the stopped-flow signal with a double exponential function (equation 3).

| Stopped-flow kinetic parameters | $A_6B_{44}A_6$ polymersomes with entrapped ACG + $CaCl_2$ | $A_6B_{44}A_6$ polymersomes with entrapped ACG + EtOH + $CaCl_2$ | $A_6B_{44}A_6$ polymersomes with entrapped ACG + 3.74 $\mu M$ Ionomycin + $CaCl_2$ |
|---------------------------------|-----------------------------------------------------------|------------------------------------------------------------------|------------------------------------------------------------------------------------|
| $k_1 [s^{-1}]$                  | 4.70                                                      | 4.35                                                             | 4.30                                                                               |
| $k_2 [s^{-1}]$                  | 0.09                                                      | 0.07                                                             | 0.27                                                                               |
| $\Delta A_1$                    | 0.11                                                      | 0.11                                                             | 0.26                                                                               |
| $\Delta A_2$                    | 0.06                                                      | 0.05                                                             | 0.125                                                                              |

## References

1. F. Itel, M. Chami, A. Najer, S. Lörcher, D. Wu, I. A. Dinu and W. Meier, *Macromolecules*, 2014, **47**, 7588-7596.
